# Supplementary material
Source: PubMed Central journal article supplement (PMC3732408)

1 **Table S1: Plasmids<sup>a</sup>**  
 2

| Plasmid   | Genotype                                                      |                               |
|-----------|---------------------------------------------------------------|-------------------------------|
| pDG268    | <i>amyE::lacZ cat amp</i>                                     | (Guérout-Fleury et al., 1996) |
| pDG1515   | <i>tet amp</i>                                                | (Guérout-Fleury et al., 1995) |
| pDP376    | $\Omega\Delta$ <i>remsite34 mls amp</i>                       |                               |
| pDP377    | $\Omega\Delta$ <i>remsite56 mls amp</i>                       |                               |
| pKB116    | <i>P<sub>tac</sub>-MBP-remA lacIq amp</i>                     |                               |
| pMAL-c2x  | <i>P<sub>tac</sub>-MBP-lacZ lacIq amp</i>                     | (New England Biolabs)         |
| pMiniMAD2 | <i>ori<sup>BSTs</sup> amp mls</i>                             | (Patrick and Kearns, 2008)    |
| pRLG770   | transcription vector                                          | (Ross et al., 1990)           |
| pRLG1507  | pSL6 circular permutation vector                              | (Gosink et al., 1993)         |
| pRLG3422  | pRLG770 containing <i>lacUV5</i> (-45/+1)                     | (Gaal et al., 1997)           |
| pRLG7340  | pSL6 containing <i>rrnB</i> P1 (-73/+50)                      |                               |
| pRLG11810 | pRLG770 containing <i>P<sub>eps</sub></i> (-452/+35)          |                               |
| pRLG11811 | pRLG770 containing <i>P<sub>eps</sub> Δremsite34</i>          |                               |
| pRLG11812 | pRLG770 containing <i>P<sub>eps</sub> Δremsite56</i>          |                               |
| pRLG11825 | pRLG770 containing <i>P<sub>eps improved</sub></i> (-452/+35) |                               |
| pRLG12757 | pRLG770 containing <i>P<sub>eps</sub></i> (-107/+35)          |                               |
| pRLG12759 | pRLG770 containing <i>P<sub>eps</sub></i> (-159/+35)          |                               |
| pRLG12760 | pRLG770 containing <i>P<sub>eps</sub></i> (-176/+35)          |                               |
| pRLG12764 | pRLG770 containing <i>P<sub>eps</sub></i> (-121/+35)          |                               |
| pRLG12766 | pSL6 containing <i>P<sub>eps</sub></i> (-159/+35)             |                               |
| pRLG12783 | pSL6 containing <i>P<sub>opuA</sub></i> (-159/+35)            |                               |
| pRLG12784 | pRLG770 containing <i>P<sub>opuA</sub></i> (-172/+27)         |                               |
| pRLG12785 | pSL6 containing <i>P<sub>tapA</sub></i> (-168/+65)            |                               |
| pRLG12786 | pRLG770 containing <i>P<sub>tapA</sub></i> (-168/+65)         |                               |

3 <sup>a</sup>Numbers in parentheses indicate the boundaries of the promoter construct relative to the transcriptional  
 4 start site.

5 **Table S2: Primers**  
6

| Primer | Sequence                                     |
|--------|----------------------------------------------|
| 1527   | AGGAGGAATTCATGACGATTAAGCTGATTAATATCGGA       |
| 1528   | CTCCTGGATCCAACCCTCTTTCTTTCATGCGGCAA          |
| 1620   | GCGCTACGGCGTTTCACTTC                         |
| 2713   | AGGAGGAATTCCTCCGCCATCAGCGCTTT                |
| 2714   | CTCCTCTCGAGTCTCTAATTTACTGCACTTC              |
| 2715   | CTCCTCTCGAGCTTATTATTTAAATTTTATAAAGAAC        |
| 2716   | AGGAGCTCGAGTGTTCTCTAAAGAGAATTATTG            |
| 2717   | AGGAGCTCGAGGAGGAAAATCATGATTTTGTTTC           |
| 2718   | CTCCTGGATCCGATCGTGATCCTGAACGGCA              |
| 3250   | ACGACTCACTATAGGGCGAATTG                      |
| 3251   | CTCACTAAGGGAACAAAAGCTGG                      |
| 3318   | TCCTGCCTAAACGCCGTCGT                         |
| 3319   | CAATTCGCCCTATAGTGAGTCGTCTGCCTTCTTTGTTTGTTC   |
| 3320   | CCAGCTTTTGTTCCCTTTAGTGAGTGATTTGGCACCAGTATGAC |
| 3321   | GCATATGTATATCACAACCTCGC                      |
| 4633   | AGGAGGAATTCATGTTGCGCGGTCAGAAAATTA            |
| 4831   | AGGAGGAATTCGTACGGCTTGCACTAAATGT              |
| 5619   | CTCCTAAGCTTCCC CGGGCTGGCTTCCCGC              |
| 5620   | GCAGCGAATTCGGGAAGTGCAGTAAATTAGAGGAA          |
| 5892   | GGCTTATTTTGCAATTTGTAATAATAACGTTTTTC          |
| 6097   | GCGGCGGATCCCCCGGGCTGGCTTCCCGC                |
| 6157   | AGGAGGAATTCCTCTATTCTGTGTTATTTTC              |
| 6158   | AGGAGGAATTCATTTTCGTTTATTATAAGGAATTTTTCGT     |
| 6159   | AGGAGGAATTCATTTAAATAATAAGGGAAGTGCAGTAA       |
| 6463   | AGGAGGAATTCGGATATGCATTTAAATTCTCACATAAC       |
| 6464   | TCCTCAAGCTTCATATCTTACCTCCTGTAAAACACTG        |
| 6465   | AGGAGGAATTCCTAAAGGTAGGAGAAAAATCACCCGT        |
| 6466   | TCCTCAAGCTTCATATTTTCCCTCCATATTAAGCAAT        |

7  
8

9 **Table S3:  $\beta$ -galactosidase data**

| Genotype         | <i>amyE::P<sub>eps</sub>-lacZ</i> | <i>amyE::P<sub>eps</sub><sup>improved</sup>-lacZ</i> |
|------------------|-----------------------------------|------------------------------------------------------|
| Wild type        | 12 ± 4 (DS1882)                   | 25 ± 6 (DS9468)                                      |
| <i>sinR</i>      | 480 ± 38 (DS2609)                 | 1751 ± 320 (DS9467)                                  |
| <i>remA</i>      | 1 ± 0 (DS2913)                    | 14 ± 1 (DS9469)                                      |
| <i>remA sinR</i> | 1 ± 0 (DS2911)                    | 7 ± 1 (DS9466)                                       |
| <i>sinI</i>      | 1 ± 0 (DK444)                     | 16 ± 2 (DK445)                                       |

10 † All cultures were grown to 1.5 OD<sub>600</sub> in LB medium. All values are the average of three  
 11 replicas (Miller units ± standard deviation). This table contains the raw data for Figure  
 12 1. Strains used to generate the data are indicated in parentheses.

13

14

15 **Supplemental Figure Legends**

16

17 **Figure S1. RemA binds in an array upstream of target promoters.** A) The  
18 sequences of the  $P_{eps}$ ,  $P_{tapA}$ , and  $P_{opuA}$  promoters (Kearns et al., 2005; Chu et al., 2006;  
19 Hoffman et al., 2013). The -35 and -10 promoter elements and the +1 transcriptional  
20 start sites are underlined. RemA binding sites (BS) are indicated in red. B) A  
21 consensus binding site was predicted using Weblogo assuming that each of the RemA  
22 binding sites is part of a series of direct repeats (Crooks et al., 2004).

23

24 **Figure S2. RemA is highly conserved and is typically found upstream of the gene**  
25 **that encodes Gmk.** A) Multiple sequence alignment and boxshade analysis of RemA  
26 sequences from the following bacteria: Bsu, *Bacillus subtilis*; Ban, *Bacillus anthracis*,  
27 Oih, *Oceanobacillus iheyensis*, Cbo, *Clostridium botulinum*, Tet, *Thermoanaerobacter*  
28 *ethanolicus*, Tma, *Thermotoga maritima*, Pmo, *Petrotoga mobilis*, Tye,  
29 *Thermodesulfovibrio yellowstonii*, Dvu, *Desulfovibrio vulgaris*, Det, *Dehalococcoides*  
30 *ethenogenes*, Npu, *Nostoc punctiforme*, Ssp, *Synechococcus sp.* Carets indicate the  
31 sites of loss-of-function missense mutations *sor4* (R18W) and *sor31* (P29S) reported in  
32 Winkelman et al., 2009. B) Neighborhood analysis of genes surrounding *remA* in  
33 various genomes that correspond to the predicted RemA products aligned in Fig S2A.  
34 Neighborhood analysis was conducted using [www.microbesonline.org](http://www.microbesonline.org). Named genes  
35 are color coded to indicate conservation in the various genomes. Gray genes are  
36 genes that are not highly conserved with other genomes in this neighborhood. Gene  
37 lengths and distances are not to scale.

38

Figure S1

A) Peps

BS6 BS5 BS4 BS3 BS2 BS1  
 ataAGGGAAGtgcAGTAAATtagAGGAAAAtcaTGATTTTggtCTCTAAAgagAACTTATtggcttattt  
 tgcaatttttaaataataacgttttcttttataatccaatca  
 -35 -10 +1

PtapA

BS6 BS5 BS4 BS3 BS2 BS1  
 atgAGCAATActgAGCAAGActtTGTAATAtgaTGAAAACattCTTTTAAacgAACAAAAtgagcgattt  
 cgggtgtttttaaatctataaatcgttgattataactctattttg  
 -35 -10 +1

PopuA

BS5 BS4 BS3 BS2 BS1  
 cccgtaaaatacaATCATATaggAGGATTAcagAGCATTTagaAGCATAAataAGATCATgtggtcacat  
 ggatgtttataaagaaatggtacagaataaaagagaatatgctgtttgtgtgggaagttacataaatgtt  
acggtaataaag -35  
 -10 +1

B)

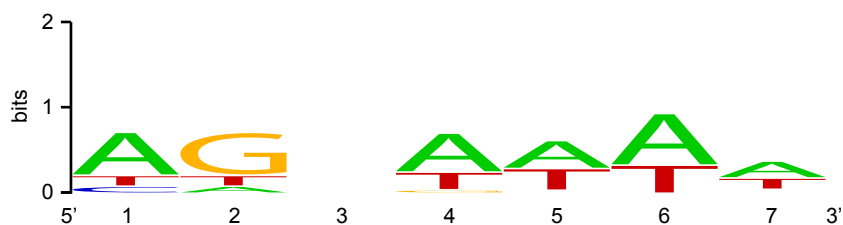

Figure S2

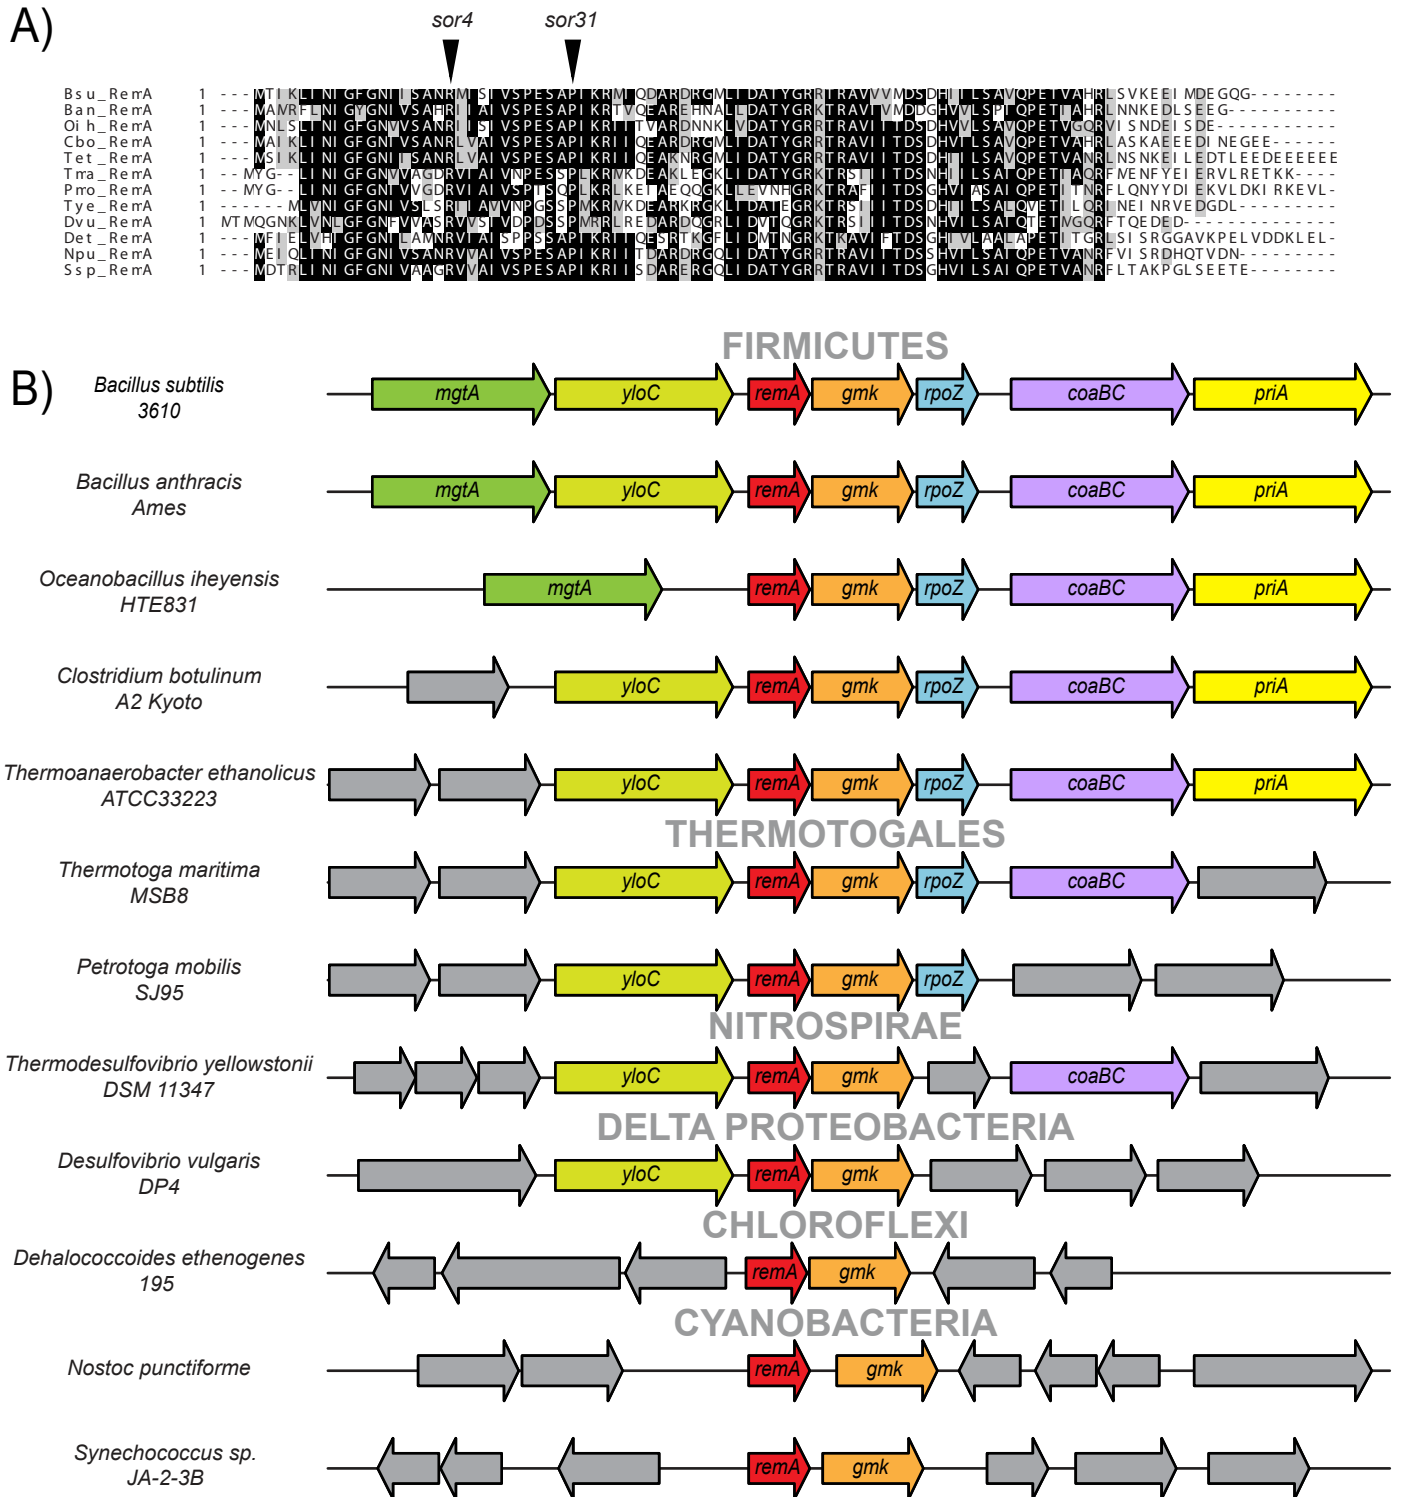

Supplement: NIHMS480340-supplement-Supplementary_File.pdf [file NIHMS480340-supplement-Supplementary_File.pdf]
